# Supplementary material for: Impact of trace extrinsic defect formation on the local symmetry transition in spinel LiNi0.5Mn1.5O4−δ systems and their electrochemical characteristics
Source: Royal Society of Chemistry journal article supplement (doi:10.1039/c8ta07825d), 2018-01-01
Supplement: c8ta07825d1.pdf [file c8ta07825d1.pdf]

## Supporting Information

### Impact of trace extrinsic defect formation on the symmetry transition in spinel $\text{LiNi}_{0.5}\text{Mn}_{1.5}\text{O}_{4-\delta}$ and their electrochemical characteristics

Hiromasa Shiiba,<sup>a,†</sup> Nobuyuki Zettsu,<sup>a,b,†,\*</sup> Satoru Kida,<sup>a</sup> Dae-wook Kim,<sup>a</sup> and Katsuya Teshima<sup>a,b,\*</sup>

<sup>a</sup> Department of Materials Chemistry, Shinshu University, 4-17-1 Wakasato, Nagano 380-8553, Japan

<sup>b</sup> Center for Energy and Environmental Science, Shinshu University, 4-17-1 Wakasato, Nagano 380-8553, Japan

A schematic illustration of the metal excess model is shown in Fig. S1. The defect formation energy in metal excess models is expressed with Kröger-Vink;

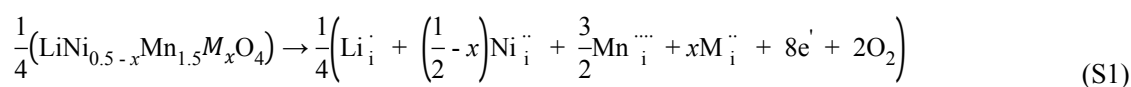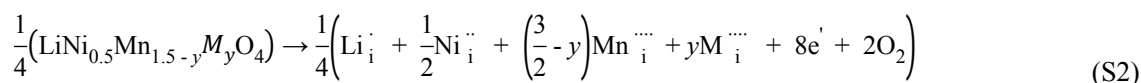

The defect generation energy can be expressed with the equations (1) and (2) in the main text using the total energy  $E(\text{X})$  obtained by the first principles calculation.

#### Effects of transition metal substitution on the $\text{Ni}^{2+}/\text{Mn}^{4+}$ ordering

Two different types of oxygen defect models, an oxygen vacancy model and metal-excess model, were used for the calculations. Oxygen vacancies occupied at nearest neighbor oxygen sites from substituted metals in the oxygen vacancy model. The oxygen vacancy formation energies for  $P4_332$  and  $Fd-3m$   $\text{LiNi}_{0.375}\text{Mn}_{1.5}\text{M}_{0.125}\text{O}_4$  and  $\text{LiNi}_{0.5}\text{Mn}_{1.375}\text{M}_{0.125}\text{O}_4$  ( $\text{M} = \text{Ti}, \text{V}, \text{Cr}, \text{Fe}, \text{Co}, \text{Cu}, \text{Zn}, \text{Sn}$ ) are summarized in Supplementary Figure S1. From the crystallographic features, oxygen atoms included in both  $P4_332$  and  $Fd-3m$  type symmetries have two possible spatial

configurations: coordinated with one Ni atom and two Mn atoms, or coordinated with three Mn atoms. A series of  $\text{LiNi}_{0.375}\text{Mn}_{1.5}\text{M}_{0.125}\text{O}_4$  derivatives showed higher formation energies than those of  $\text{LiNi}_{0.5}\text{Mn}_{1.375}\text{M}_{0.125}\text{O}_4$  compounds independent of the transition metal type. Since the formation of lattice defects as described by  $\text{M}_{\text{Ni}^{2+}}$  simultaneously generates  $\text{Mn}^{3+}$  and  $\text{M}_{\text{Mn}^{4+}}$  lattice defects due to corresponding charge neutralization, oxygen vacancy-free  $\text{LiNi}_{0.375}\text{Mn}_{1.5}\text{M}_{0.125}\text{O}_4$  compounds are considered to be less stable. In contrast, the oxygen vacancy formation energies for the incorporation of  $\text{Fe}_{\text{Mn}}$ ,  $\text{Cu}_{\text{Ni}}$ ,  $\text{Cu}_{\text{Mn}}$ , and  $\text{Zn}_{\text{Mn}}$ , were significantly lower than stoichiometric  $\text{LiNi}_{0.5}\text{Mn}_{1.5}\text{O}_4$ . In particular, divalent  $\text{Cu}_{\text{Mn}}^{2+}$  and  $\text{Zn}_{\text{Mn}}^{2+}$  can be preferentially incorporated at oxygen vacancy sites without  $\text{Mn}^{3+}$  formation.

We further considered the effects of Frenkel defects, in which transition metals occupy interstitial sites, by using the metal-excess model for DFT calculations. The positions of two neighboring tetrahedral Li ions are assumed to migrate to octahedral vacancy sites, as shown in Supplementary Figure S2(a); this is the most stable cationic arrangement for interstitial Ni and Mn. Defect formation energies for the metal-excess model for  $\text{LiNi}_{0.5-x}\text{Mn}_{1.5}\text{M}_x\text{O}_4$  and  $\text{LiNi}_{0.5}\text{Mn}_{1.5-y}\text{M}_y\text{O}_4$  ( $0 \leq x \leq 0.125$ ,  $0 \leq y \leq 0.125$ ,  $\text{M} =$  (b) Ti, (c) V, (d) Cr, (e) Fe, (f) Co, (g) Cu, (h) Zn, (i) Sn) with  $P4_332$  and  $Fd-3m$  type symmetries were summarized in Supplementary Figure S2(b-i). As in the case of the stoichiometric  $\text{LiNi}_{0.5}\text{Mn}_{1.5}\text{O}_4$ , the defect formation energy of the  $Fd-3m$  type structure was lower than that of the  $P4_332$  structure, independent of the transition metal cation inducing the extrinsic defect formation. We further evaluated antisite defect formation energies for the substituted transition metals and neighboring Ni/Mn in both  $P4_332$  and  $Fd-3m$ , as shown in Supplementary Figure S3. The Ni or Mn sites forming the antisite defects are spatially distinguished by the difference in the point-to-point sharing and the edge sharing with the Li octahedron. Two different Ni sites (P - MNi

1, P - MNi 2) and two Mn sites (P - MMn 1, P - MMn 2) are possible in the  $P4_332$  structure, and one possible Ni site (F - MNi) and three Mn sites (F - MMn 1, F - MMn 2, F - MMn 3) exists in the  $Fd-3m$  structure, respectively. Our calculations imply that Ti, V, Cr, Fe, Co, Sn cations preferentially occupy Mn sites, forming extrinsic defects ( $Ti_{Mn}^{\times}$ ,  $V_{Mn}^{\times}$ ,  $Cr_{Mn}^{\cdot}$ ,  $Fe_{Mn}^{\cdot}$ ,  $Co_{Mn}^{\cdot}$ ,  $Sn_{Mn}^{\times}$ ) compared to the occupation of interstitial sites (Frenkel defects). In contrast,  $Cu^{2+}$  favorably occupied interstitial sites ( $Cu_{int}^{\cdot\cdot}$ ). We estimated the energy for disordering Ni/Mn arrangements caused by the penetration of transition metals into interstitial sites (Supplementary Figure S4). This implies that the Ni/Mn disordering was highly promoted due solely to Cu substitution according to negative antisite energy.

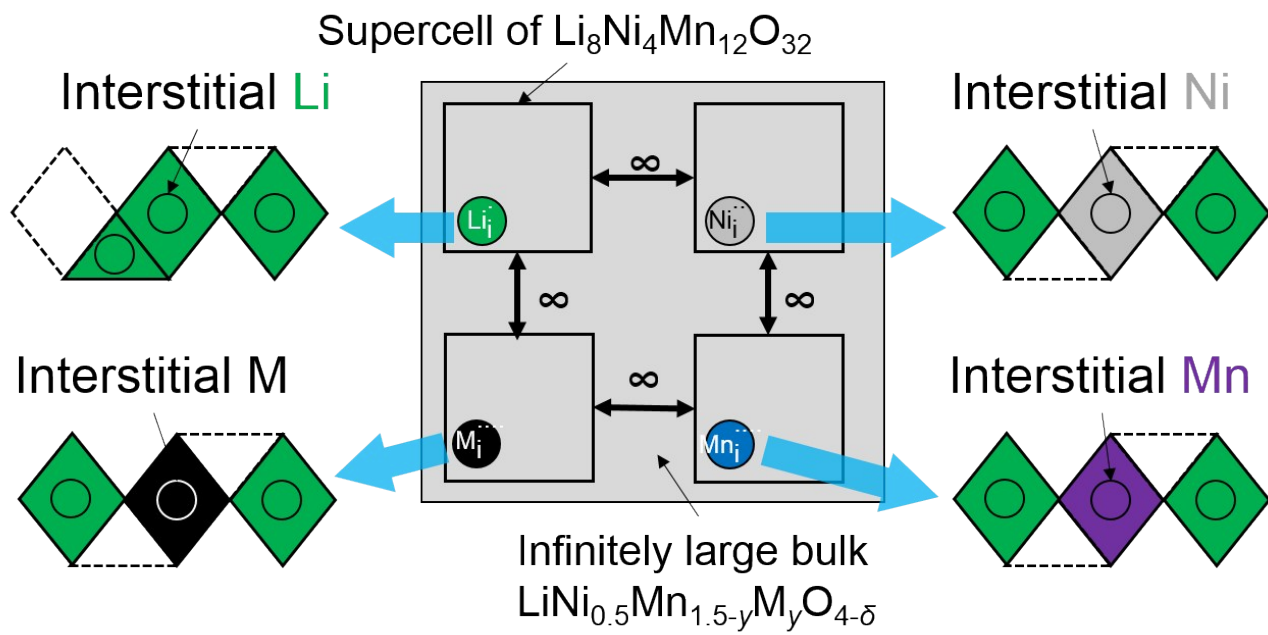

**Supplementary Figure S1**

Schematic illustration of metal-excess model for  $\text{LiNi}_{0.5}\text{Mn}_{1.5-y}\text{M}_y\text{O}_4$ .

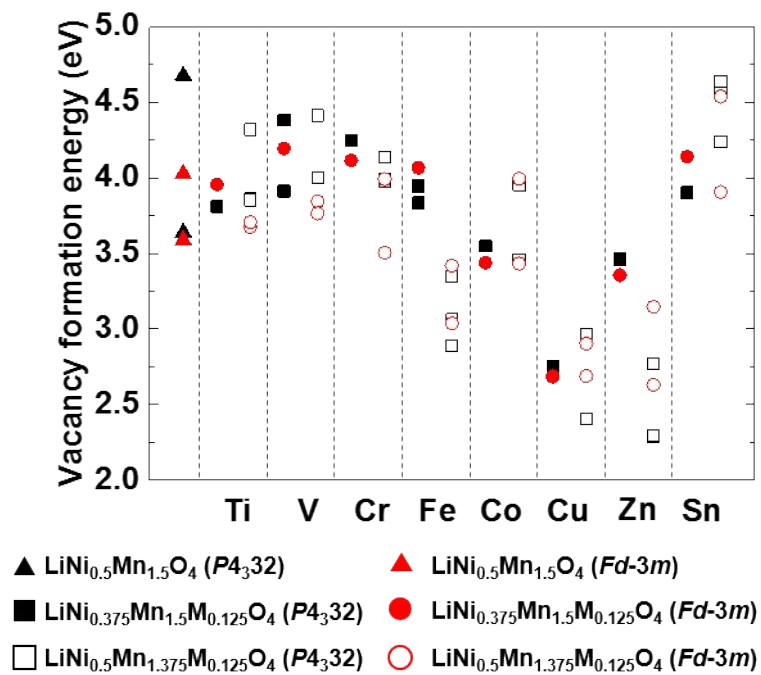

### Supplementary Figure S2

Oxygen vacancy formation energies for stoichiometric  $\text{LiNi}_{0.5}\text{Mn}_{1.5}\text{O}_4$  with  $P4_332$  and  $Fd-3m$  type symmetries.

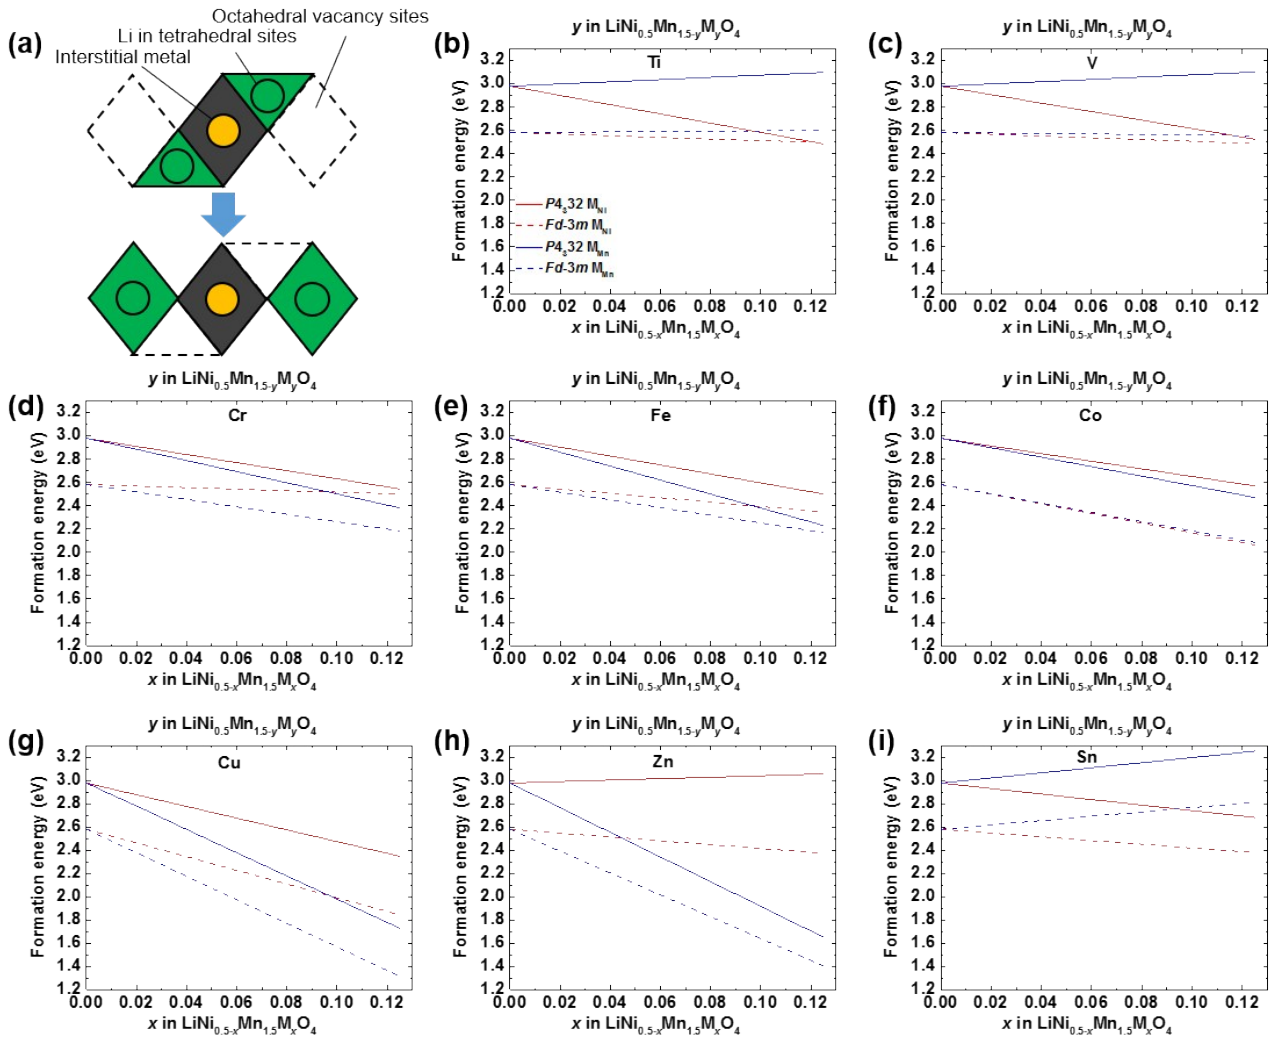

### Supplementary Figure S3

(a) Schematic illustration of positional transitions in two neighboring tetrahedral Li ions to octahedral vacancy sites, and defect formation energies for metal-excess model for  $\text{LiNi}_{0.5-x}\text{Mn}_{1.5+y}\text{M}_y\text{O}_4$  and  $\text{LiNi}_{0.5}\text{Mn}_{1.5-y}\text{M}_y\text{O}_4$  ( $0 \leq x \leq 0.125$ ,  $0 \leq y \leq 0.125$ ,  $M =$  (b) Ti, (c) V, (d) Cr, (e) Fe, (f) Co, (g) Cu, (h) Zn, (i) Sn) with  $P4_32$  and  $Fd-3m$  type symmetries.

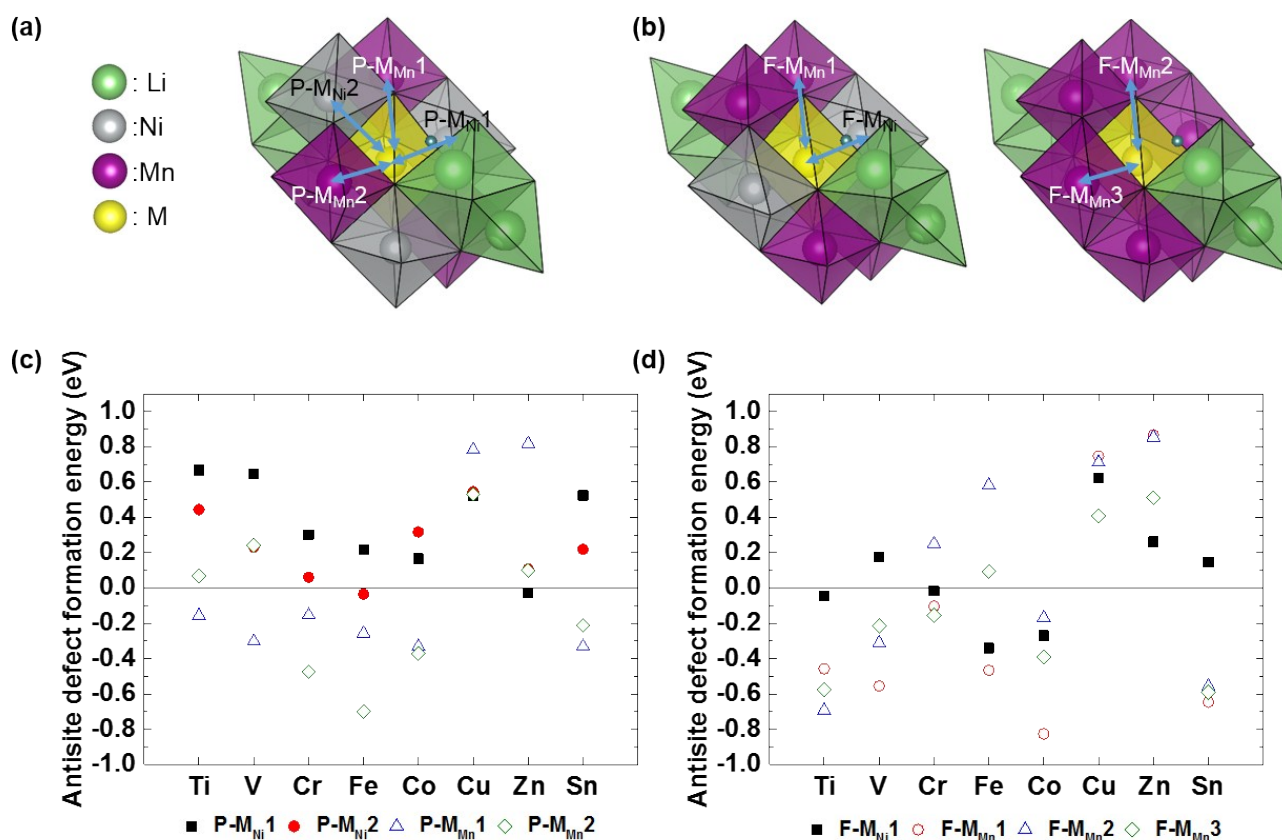

### Supplementary Figure S4

Atomic arrangement of nearest neighbor (NN) Ni/Mn around incorporated extrinsic interstitial metal (a) in  $P4_332$ , and (b), (c) in  $Fd-3m$  type structures. Possible antisite defects for the interstitial metal and NN Ni/Mn are described in the illustrations by the arrows. Corresponding antisite defect formation energies in both (d)  $P4_332$  and (e)  $Fd-3m$

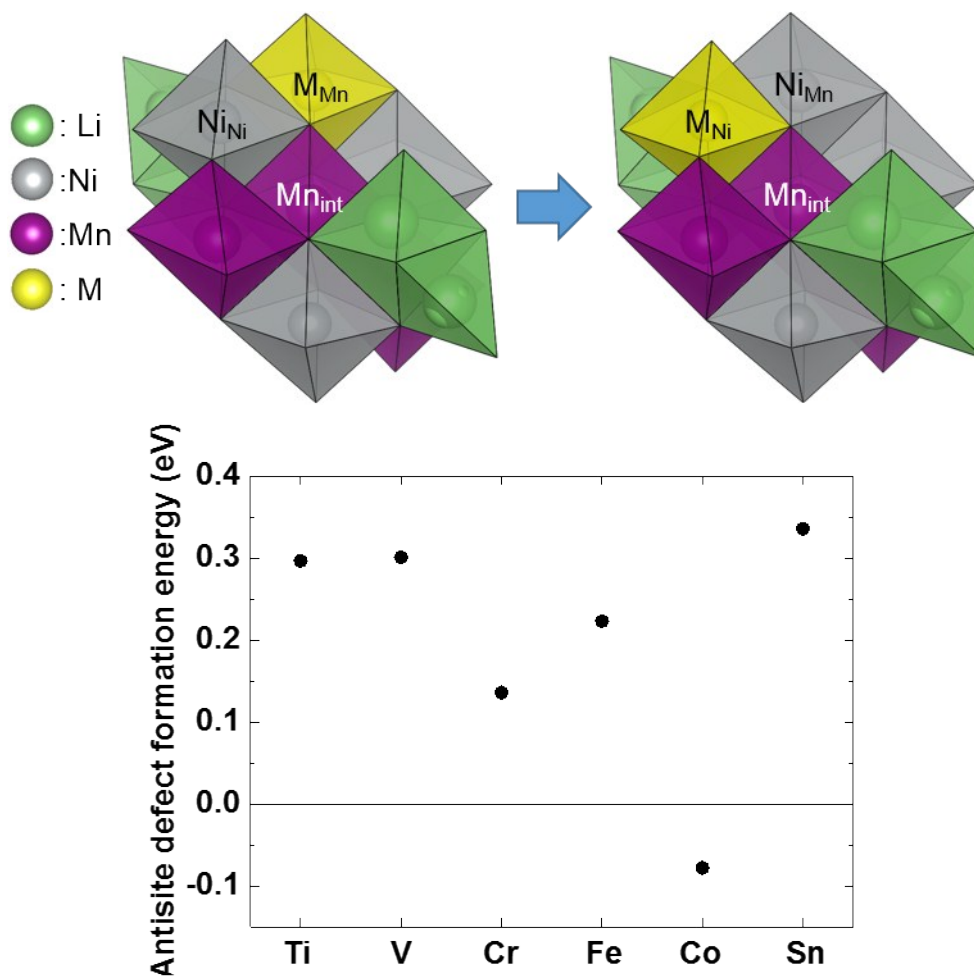

**Supplementary Figure S5**

Antisite defect formation energies for the substituted transition metal and neighboring Ni in  $LiNi_{0.5}Mn_{1.5}O_4$  with  $P4_332$  symmetry



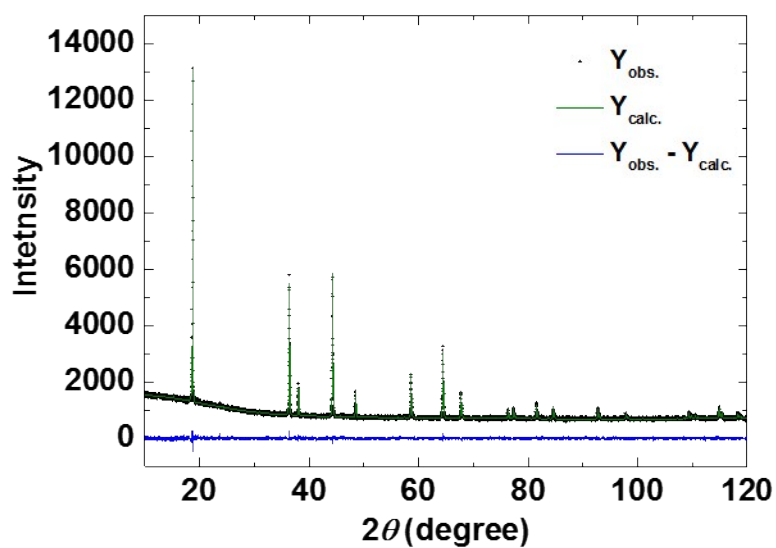

| Site | Atom | x        | y         | z         | g        | B      |
|------|------|----------|-----------|-----------|----------|--------|
| 8c   | Li   | 0.000(8) | 0.000(-)  | 0.000(-)  | 1(-)     | 1(-)   |
| 4a   | Ni   | 0.625    | 0.625     | 0.625     | 1.0(-)   | 1.1(4) |
|      | Cu1  |          |           |           | 0.009(-) |        |
| 12d  | Mn   | 0.125    | 0.3709(8) | 0.8791(-) | 1.0(1)   | 0.5(1) |
|      | Cu2  |          |           |           | 0.005(-) |        |
| 8c   | O1   | 0.393(3) | 0.393(-)  | 0.393(-)  | 1(-)     | 0.3(-) |
| 24e  | O2   | 0.130(3) | 0.865(2)  | 0.142(3)  | 0.87(2)  | 0.3(1) |

$$R_{wp} = 3.403\%, R_p = 2.692\%, R_e = 3.395\%, S = 1.003, a = 8.1691(1) \text{ \AA}$$

### Supplementary Figure S6

Powder XRD profiles and Rietveld refinement results of the Cu-incorporated  $\text{LiNi}_{0.5}\text{Mn}_{1.5}\text{O}_{4-\delta}$  derivative crystals.

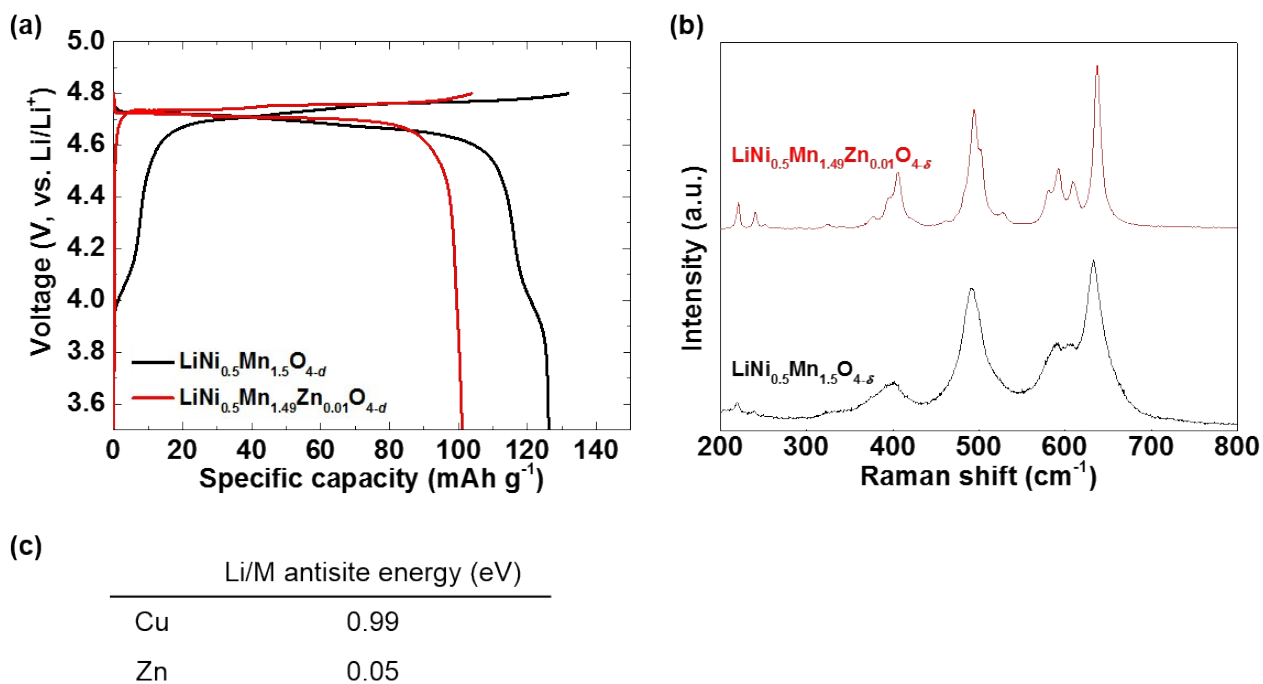

### Supplementary Figure S7

(a) Third cycle charge–discharge profiles at a current density corresponding to 0.2 C at room temperature of  $\text{LiNi}_{0.5}\text{Mn}_{1.5}\text{O}_{4-\delta}/\text{Li}$  and  $\text{LiNi}_{0.5}\text{Zn}_{0.01}\text{Mn}_{1.49}\text{O}_{4-\delta}/\text{Li}$  cells. (b) Raman shift of  $\text{LiNi}_{0.5}\text{Mn}_{1.5}\text{O}_{4-\delta}$  and  $\text{LiNi}_{0.5}\text{Mn}_{1.49}\text{Zn}_{0.01}\text{O}_{4-\delta}$ . (c) The calculated Li/M Antisite defect formation energies of  $\text{LiNi}_{0.5}\text{Mn}_{1.5}\text{O}_{4-\delta}$  and  $\text{LiNi}_{0.5}\text{Mn}_{1.49}\text{Zn}_{0.01}\text{O}_{4-\delta}$ .

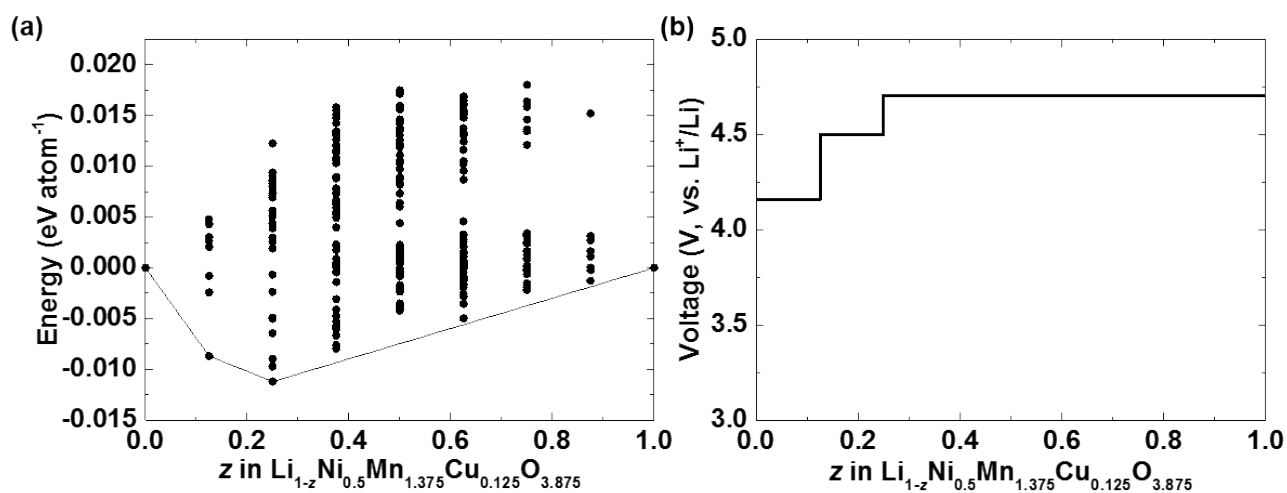

### Supplementary Figure S8

(a) Formation energies for the most stable Li/vacancy arrangement and (b) theoretical voltage slope as a function of  $z$  in  $\text{Li}_{1-z}\text{Ni}_{0.5}\text{Mn}_{1.375}\text{Cu}_{0.125}\text{O}_{3.875}$ .

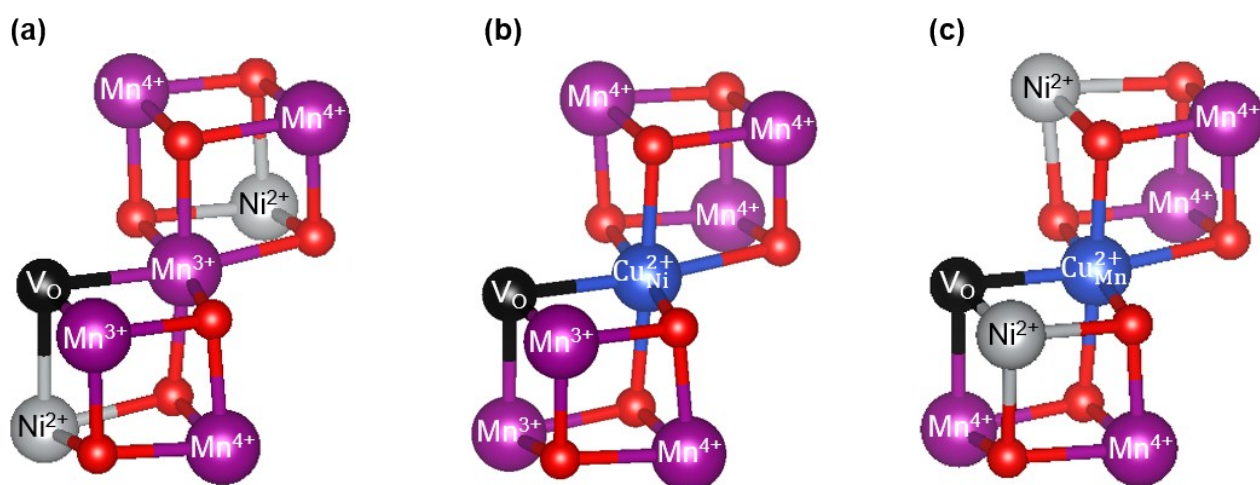

### Supplementary Figure S9

Atomic valence distribution near the  $\text{Cu}^{2+}$  and oxygen vacancies in (a)  $\text{LiNi}_{0.5}\text{Mn}_{1.5}\text{O}_{4-\delta}$ , (b)  $\text{LiNi}_{0.5-x}\text{Mn}_{1.5}\text{Cu}_x\text{O}_{4-x}$ , and (c)  $\text{LiNi}_{0.5}\text{Mn}_{1.5-y}\text{Cu}_y\text{O}_{4-y}$ .

**Supplementary Table S1**

Chemical compositions of  $\text{LiNi}_{0.5}\text{Mn}_{1.5}\text{O}_{4-\delta}$  and Cu-incorporated derivative crystals, as evaluated by inductively coupled plasma optical emission spectrometry.

|                                                                          | <b>Li</b> | <b>:</b> | <b>Ni</b> | <b>:</b> | <b>Cu</b> | <b>:</b> | <b>Mn</b> |
|--------------------------------------------------------------------------|-----------|----------|-----------|----------|-----------|----------|-----------|
| Cu-incorporated<br>$\text{LiNi}_{0.5}\text{Mn}_{1.5}\text{O}_{4-\delta}$ | 1.98      | :        | 1         | :        | 0.02      | :        | 2.98      |
| $\text{LiNi}_{0.5}\text{Mn}_{1.5}\text{O}_{4-\delta}$                    | 1.96      | :        | 1         | :        | -         | :        | 3.02      |
